# Supplementary material for: Response of global evaporation to major climate modes in historical and future CMIP5 simulations
Source: Copernicus journal article supplement (doi:10.5194/hess-2019-442), 2019-08-28
Supplement: Supplementary file 1 [file hess-2019-442-supplement.pdf]

Supplement of

**Response of global evaporation to major climate modes in historical and future CMIP5 simulations**

Thanh Le<sup>1,2</sup>, Deg-Hyo Bae<sup>1,2</sup>

5 <sup>1</sup>Department of Civil & Environmental Engineering, Sejong University, Seoul, South Korea

<sup>2</sup>Center for Climate Change Adaptation for Water Resources, Sejong University, Seoul, South Korea

Correspondence: Deg-Hyo Bae (dhbae@sejong.ac.kr)

10

**Contents of this file**

Table S1

Figures S1 to S10

Table S1. List of CMIP5 models used in this study

**Table S1.** List of CMIP5 models used in this study

| No. | Model name    | Modelling center, country |
|-----|---------------|---------------------------|
| 1   | ACCESS1-0     | CSIRO–BOM, Australia      |
| 2   | ACCESS1-3     | CSIRO–BOM, Australia      |
| 3   | CanESM2       | CCCma, Canada             |
| 4   | CMCC-CM       | CMCC, Italy               |
| 5   | CNRM-CM5      | CNRM-CERFACS, France      |
| 6   | CSIRO-Mk3-6-0 | CSIRO–QCCCE, Australia    |
| 7   | FGOALS-g2     | LASG–CESS, China          |
| 8   | IPSL-CM5A-LR  | IPSL, France              |
| 9   | IPSL-CM5A-MR  | IPSL, France              |
| 10  | IPSL-CM5B-LR  | IPSL, France              |
| 11  | MIROC-ESM     | MIROC, Japan              |
| 12  | MIROC5        | MIROC, Japan              |
| 13  | MPI-ESM-LR    | MPI-M, Germany            |
| 14  | MPI-ESM-MR    | MPI-M, Germany            |
| 15  | MRI-CGCM3     | MRI, Japan                |

## LIST OF FIGURE CAPTIONS

- 20 Figure S1. Multi-model mean probability map for the absence of Granger causality between ENSO and annual mean evaporation for the period 1906-2000 of selected regions. (a) middle Asia (regions closed to Caspian Sea). (b) tropical Indian Oceans, Indochina Peninsula, Australia. (c) tropical Pacific. (d) Pacific coast of America. Stippling demonstrates that more than 70% of models show agreement on the multi-model mean probability. The agreement of an individual model is determined when the difference between the multi-model mean probability and the selected model's probability is less than one standard deviation of multi-model mean probability. The red (yellow) contour line designates  $p$  value = 0.05 (0.1). Red shades indicate high probability of no Granger causality. ENSO = El Niño–Southern Oscillation.
- 25 Figure S2. Multi-model mean probability of no Granger causality from ENSO to seasonal evaporation for the period 1850-2005. (a) boreal Winter (December-January-February). (b) boreal Spring (March-April-May). (c) boreal Summer (June-July-August). (d) boreal Fall (September-October-November). Stippling demonstrates that more than 70% of models show agreement on the multi-model mean probability. The agreement of an individual model is determined when the difference between the multi-model mean probability and the selected model's probability is less than one standard deviation of multi-model mean probability. The red (yellow) contour line designates  $p$  value = 0.05 (0.1). Red shades indicate high probability of no Granger causality. ENSO = El Niño–Southern Oscillation.
- 30 Figure S3. As in Figure S1 but for Granger causality from ENSO to seasonal evaporation for the period 2006-2100.
- 35 Figure S4. Multi-model mean probability map for the absence of Granger causality between IOD and annual mean evaporation for the period 1906-2000 of selected regions. (a) the western tropical Indian ocean close to the eastern coast of Africa. (b) the eastern tropical Pacific. Stippling demonstrates that more than 70% of models show agreement on the multi-model mean probability. The agreement of an individual model is determined when the difference between the multi-model mean probability and the selected model's probability is less than one standard deviation of multi-model mean probability. The red (yellow) contour line designates  $p$  value = 0.05 (0.1). Red shades indicate high probability of no Granger causality.
- 40 Figure S5. As in Figure S1 but for Granger causality from IOD to seasonal evaporation for the period 1850-2005.
- 45 Figure S6. As in Figure S1 but for Granger causality from IOD to seasonal evaporation for the period 2006-2100.
- 50 Figure S7. Multi-model mean probability map for the absence of Granger causality between NAO and annual mean evaporation for the period 1906-2000 of selected regions. Stippling

demonstrates that more than 70% of models show agreement on the multi-model mean probability. The agreement of an individual model is determined when the difference between the multi-model mean probability and the selected model's probability is less than one standard deviation of multi-model mean probability. The red (yellow) contour line designates  $p$  value = 0.05 (0.1). Red shades indicate high probability of no Granger causality.

Figure S8. As in Figure S1 but for Granger causality from NAO to seasonal evaporation for the period 1850-2005.

Figure S9. As in Figure S1 but for Granger causality from NAO to seasonal evaporation for the period 2006-2100.

Figure S10. Fraction of Earth surface for land (a, c) and ocean (b, d) with probability for the absence of Granger causality between climate modes and evaporation less than 0.25 (i.e.,  $p$  value < 0.25 and climate modes are unlikely to have no causal effects on evaporation). The results are shown for the influence of individual climate mode on annual mean evaporation for periods 1906-2000 (a, b) and 2006-2100 (c, d). Fraction area lower than 0.5% is plotted in yellow bar. Fraction area higher than 0.5% and lower than 1% is plotted in cyan bar. ENSO = El Niño–Southern Oscillation. NAO = North Atlantic Oscillation. IOD = Indian Ocean Dipole.

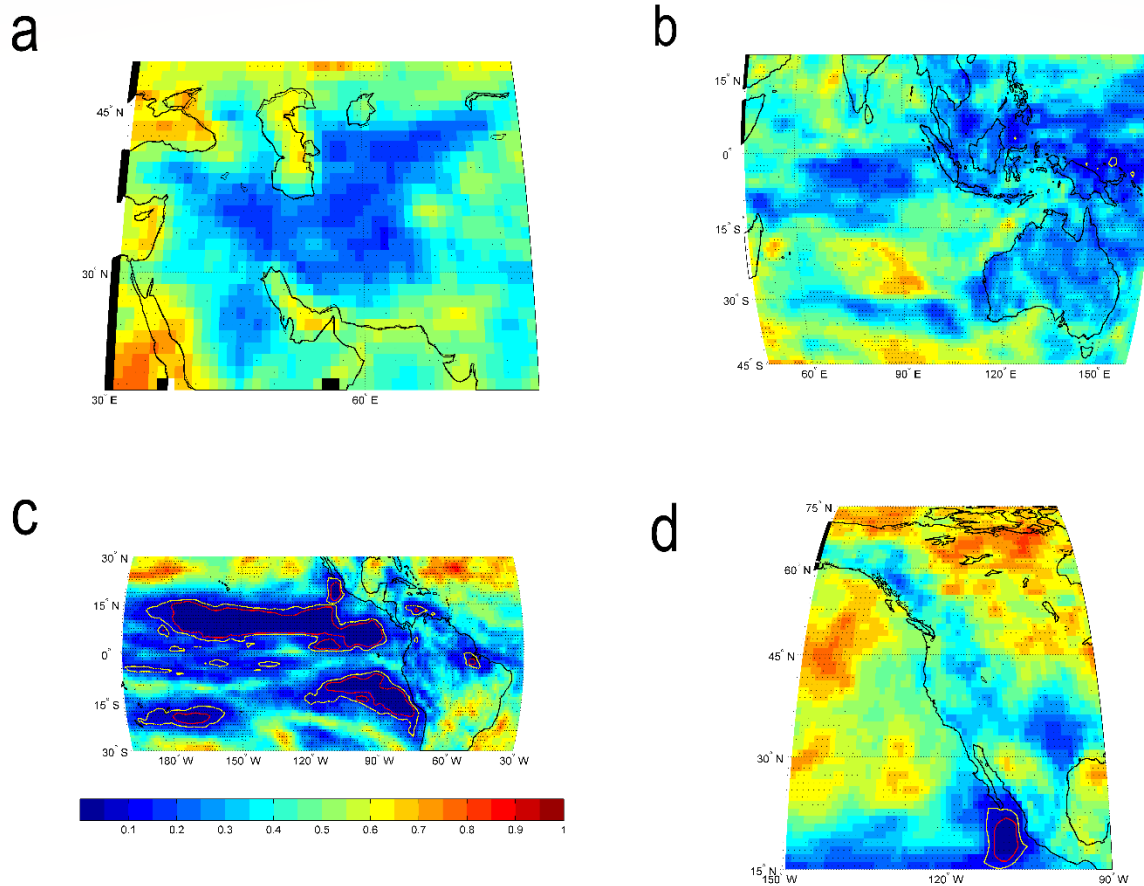

**Figure S1.** Multi-model mean probability map for the absence of Granger causality between ENSO and annual mean evaporation for the period 1906-2000 of selected regions. (a) middle Asia (regions closed to Caspian Sea). (b) tropical Indian Oceans, Indochina Peninsula, Australia. (c) tropical Pacific. (d) Pacific coast of America. Stippling demonstrates that more than 70% of models show agreement on the multi-model mean probability. The agreement of an individual model is determined when the difference between the multi-model mean probability and the selected model's probability is less than one standard deviation of multi-model mean probability. The red (yellow) contour line designates  $p$  value = 0.05 (0.1). Red shades indicate high probability of no Granger causality. ENSO = El Niño–Southern Oscillation.

80 a)

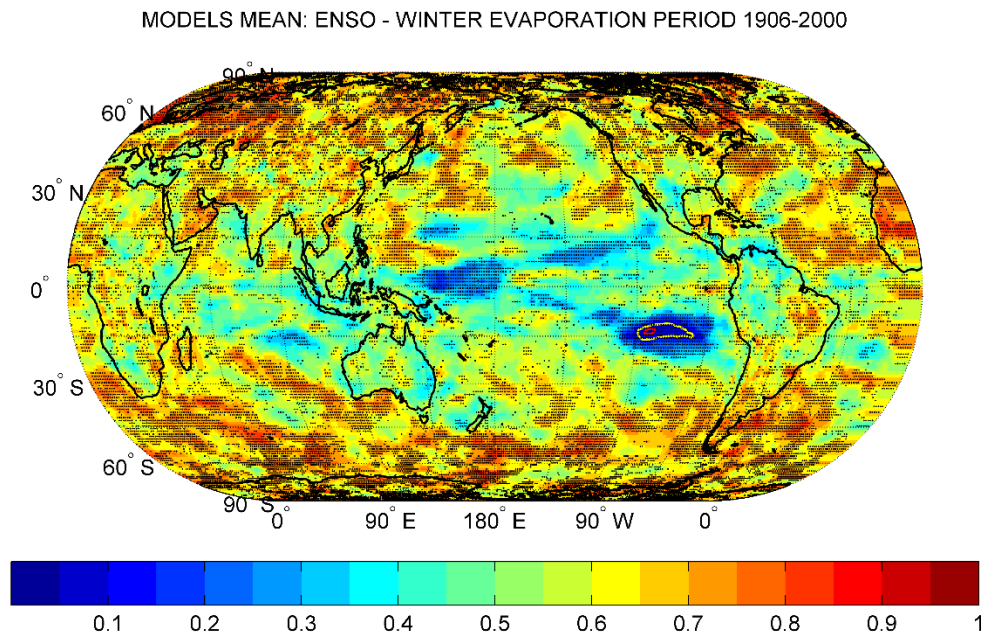

b)

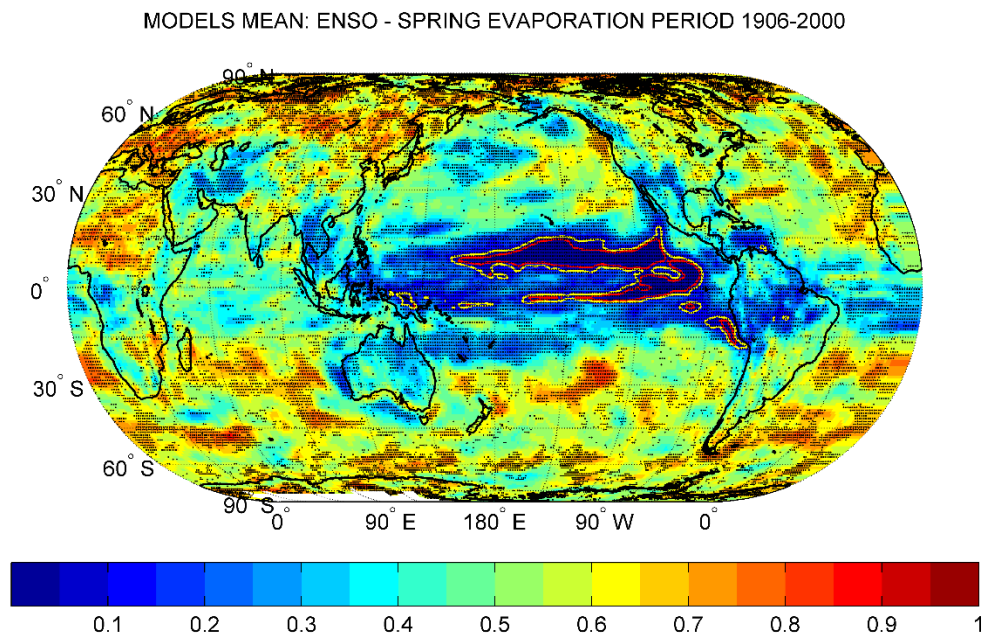

c)

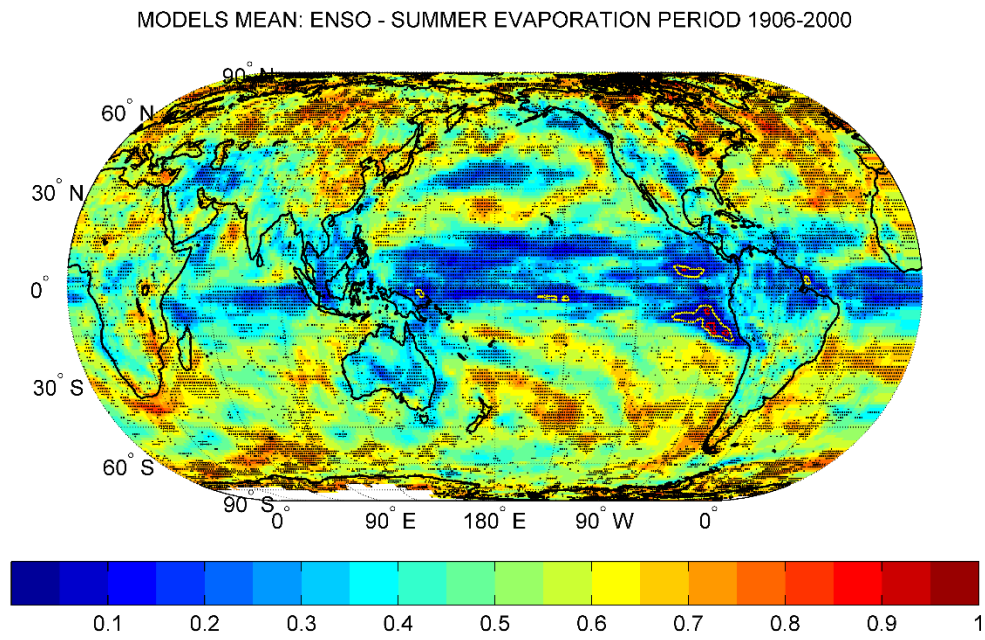

85

d)

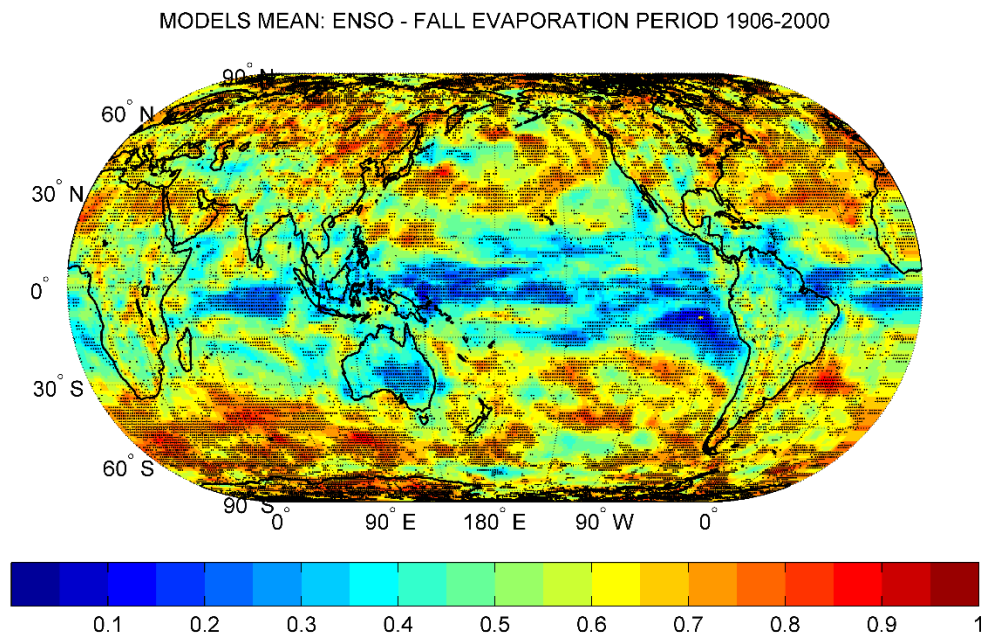



**Figure S2.** Multi-model mean probability of no Granger causality from ENSO to seasonal evaporation for the period 1850-2005. (a) boreal Winter (December-January-February). (b) boreal Spring (March-April-May). (c) boreal Summer (June-July-August). (d) boreal Fall (September-October-November). Stippling demonstrates that more than 70% of models show agreement on the multi-model mean probability. The agreement of an individual model is determined when the difference between the multi-model mean probability and the selected model's probability is less than one standard deviation of multi-model mean probability. The red (yellow) contour line designates  $p$  value = 0.05 (0.1). Red shades indicate high probability of no Granger causality. ENSO = El Niño–Southern Oscillation.

a)

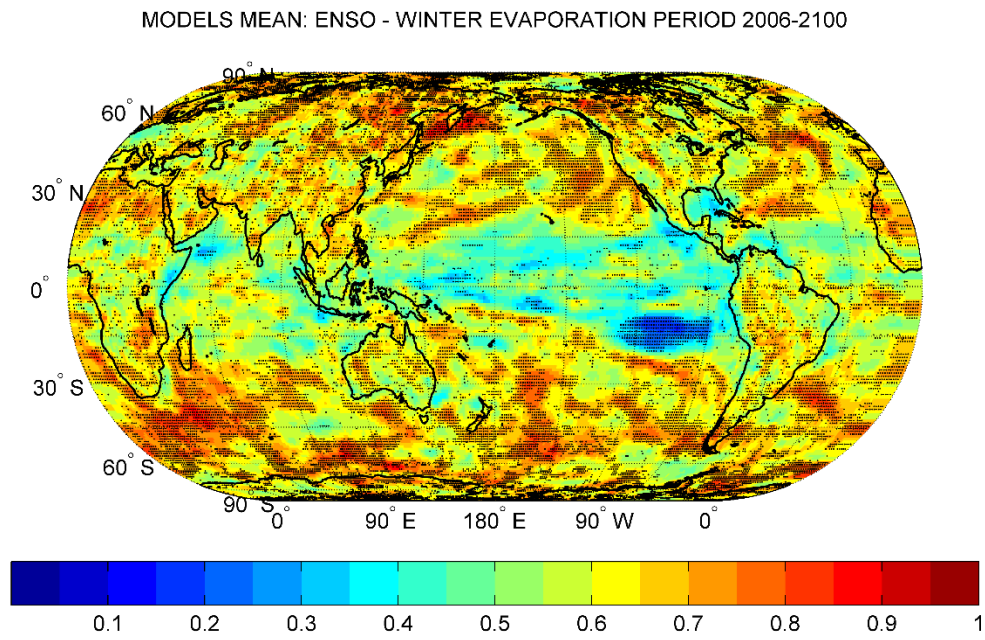

b)

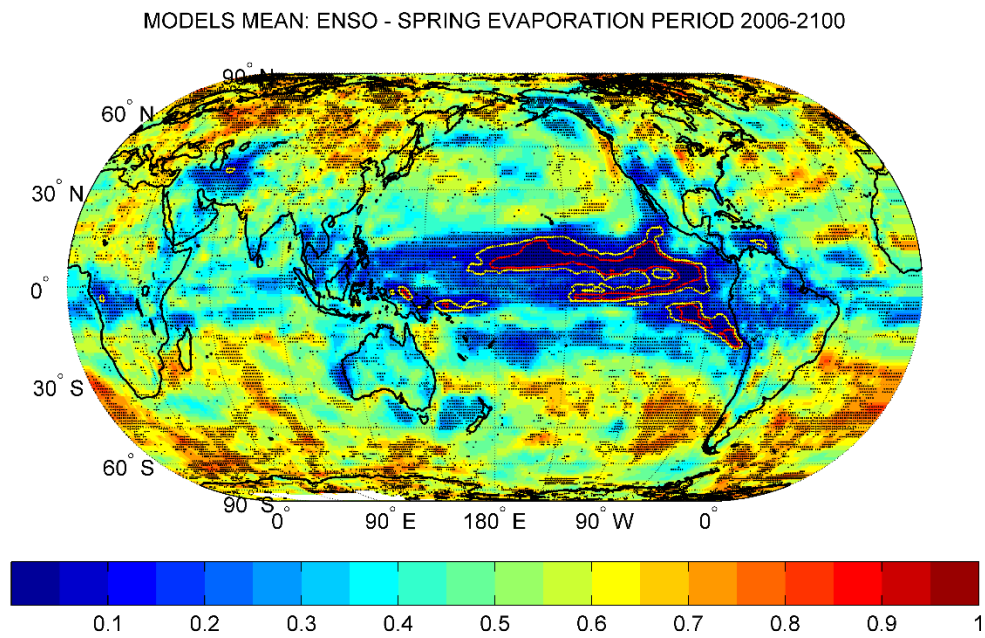

c)

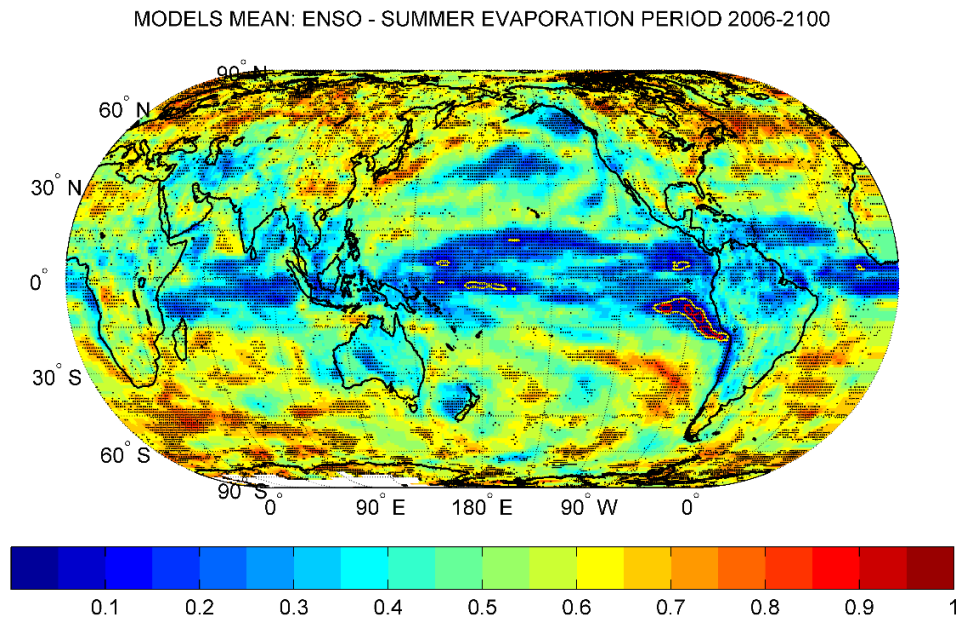

d)

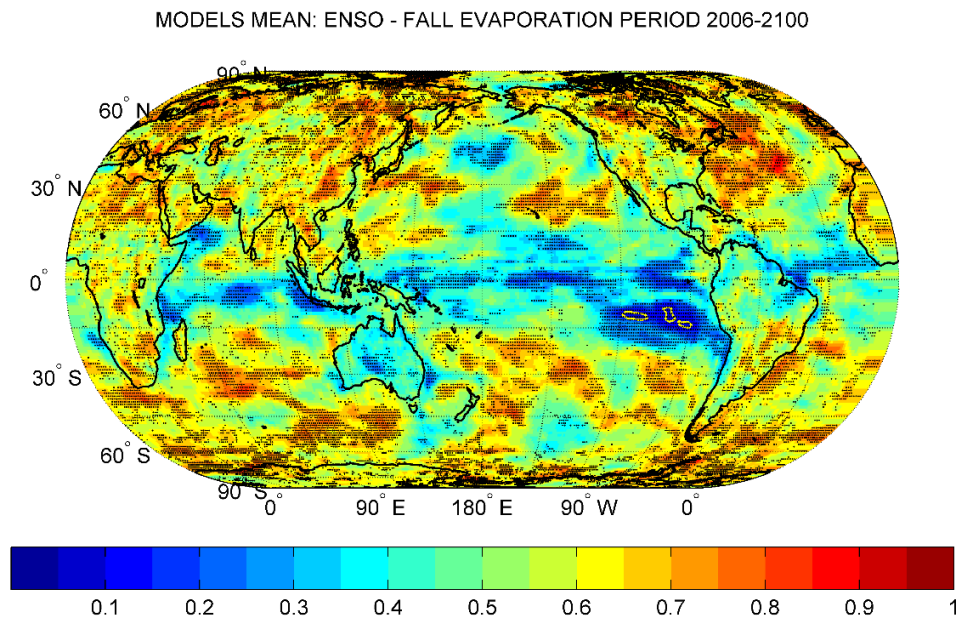

105 **Figure S3.** As in Figure S1 but for Granger causality from ENSO to seasonal evaporation for the period 2006-2100.

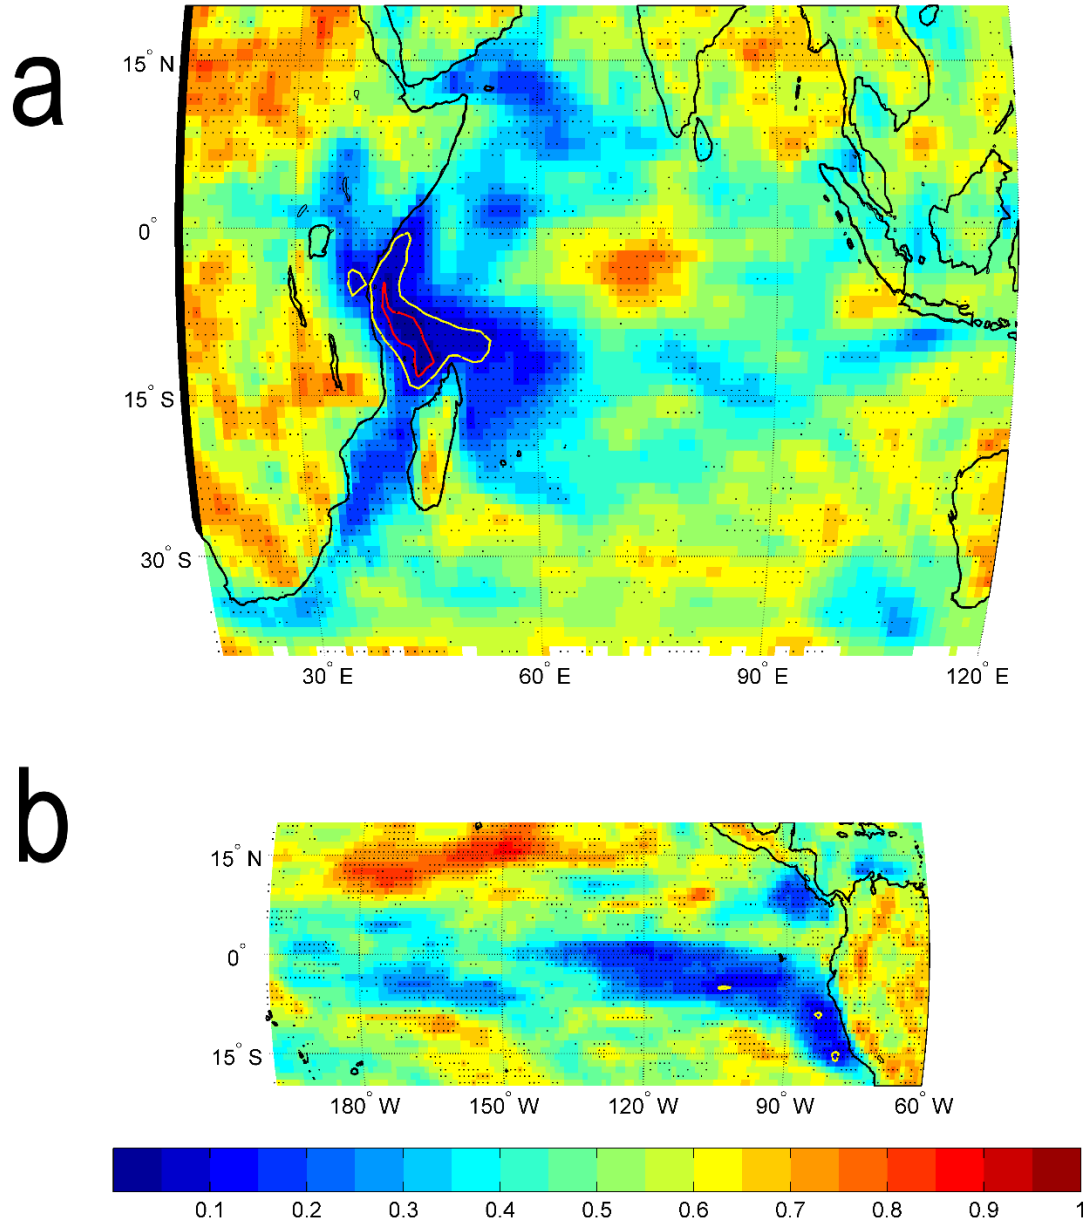

**Figure S4.** Multi-model mean probability map for the absence of Granger causality between IOD and annual mean evaporation for the period 1906-2000 of selected regions. (a) the western tropical Indian ocean close to the eastern coast of Africa. (b) the eastern tropical Pacific. Stippling demonstrates that more than 70% of models show agreement on the multi-model mean probability. The agreement of an individual model is determined when the difference between the multi-model mean probability and the selected model's probability is less than one standard deviation of multi-model mean probability. The red (yellow) contour line designates  $p$  value = 0.05 (0.1). Red shades indicate high probability of no Granger causality.



a)

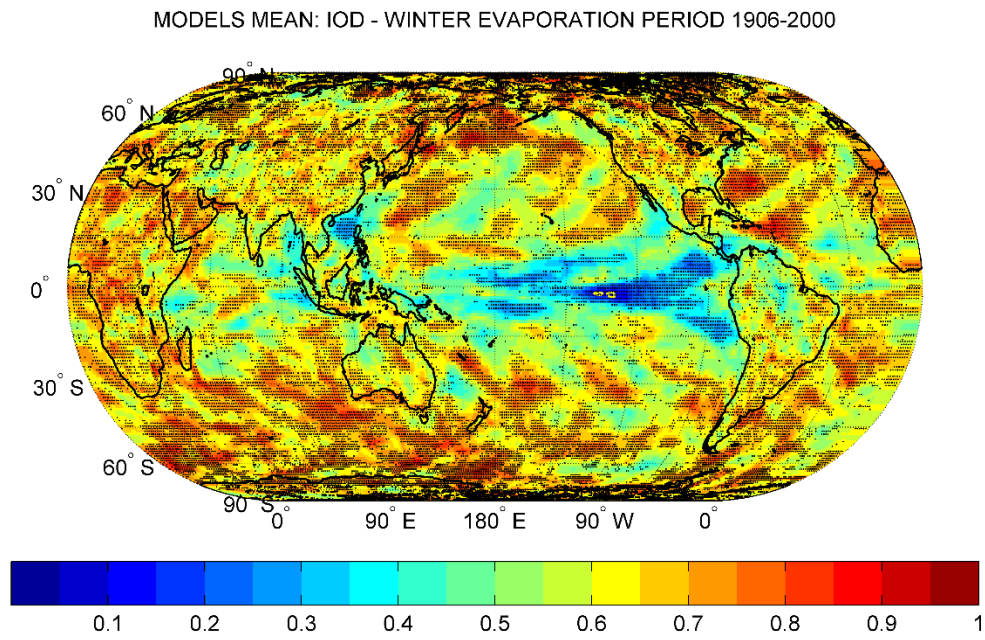

b)

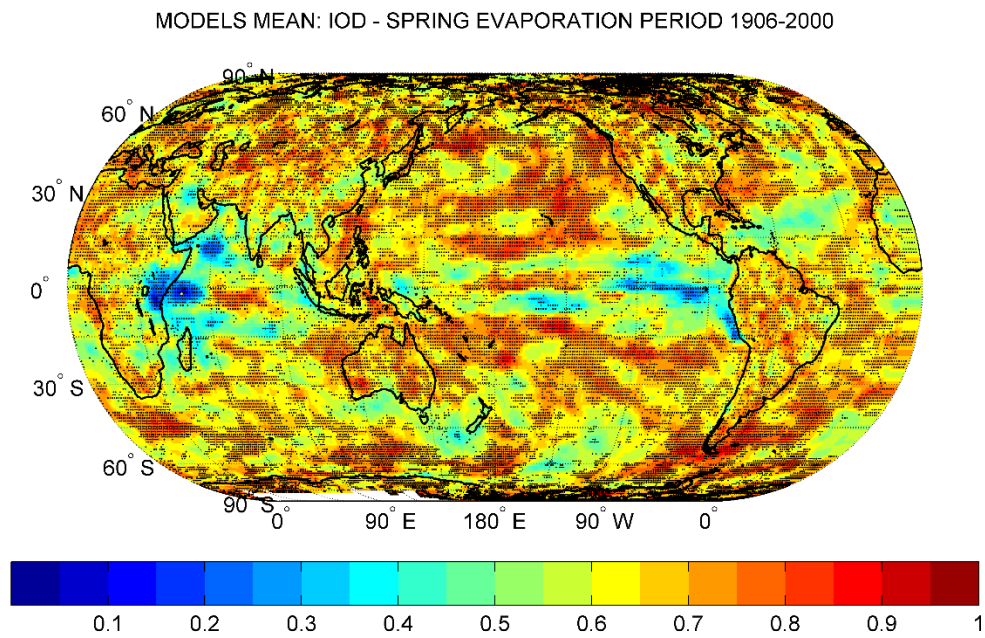

120 c)

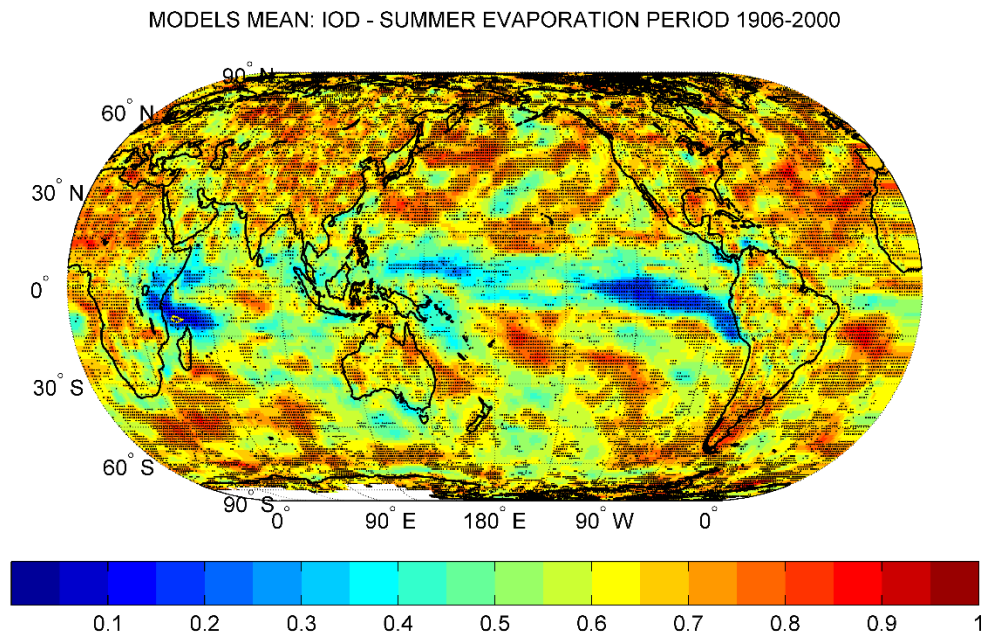

d)

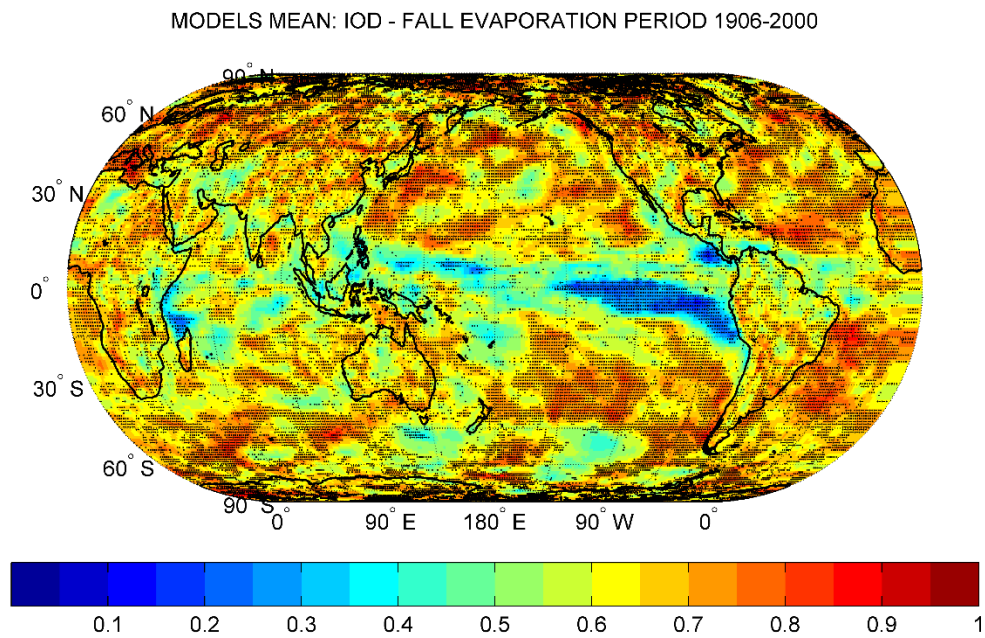

125 **Figure S5.** As in Figure S1 but for Granger causality from IOD to seasonal evaporation for the period 1850-2005.

a)

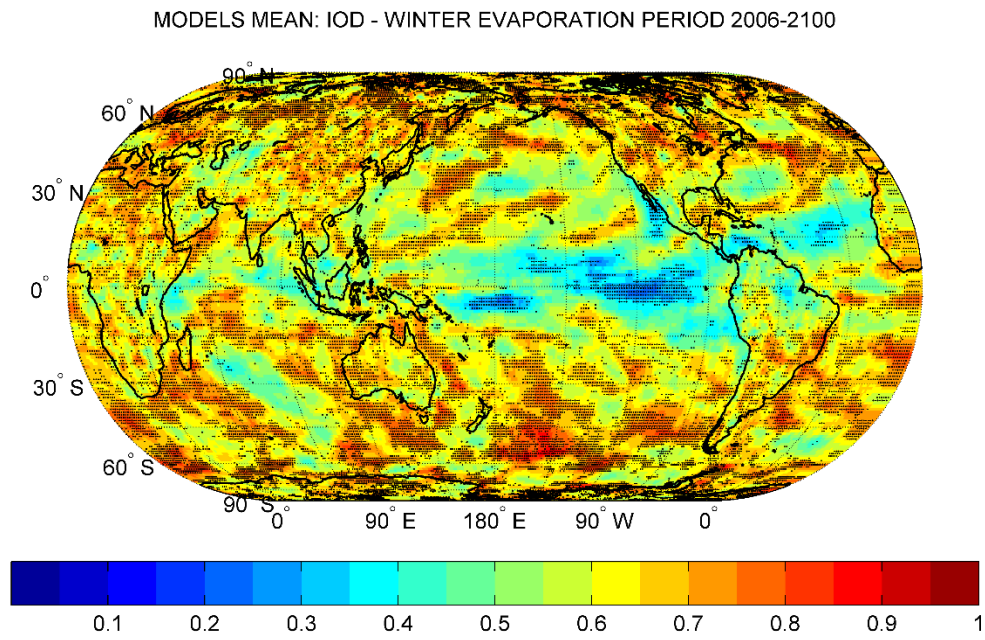

b)

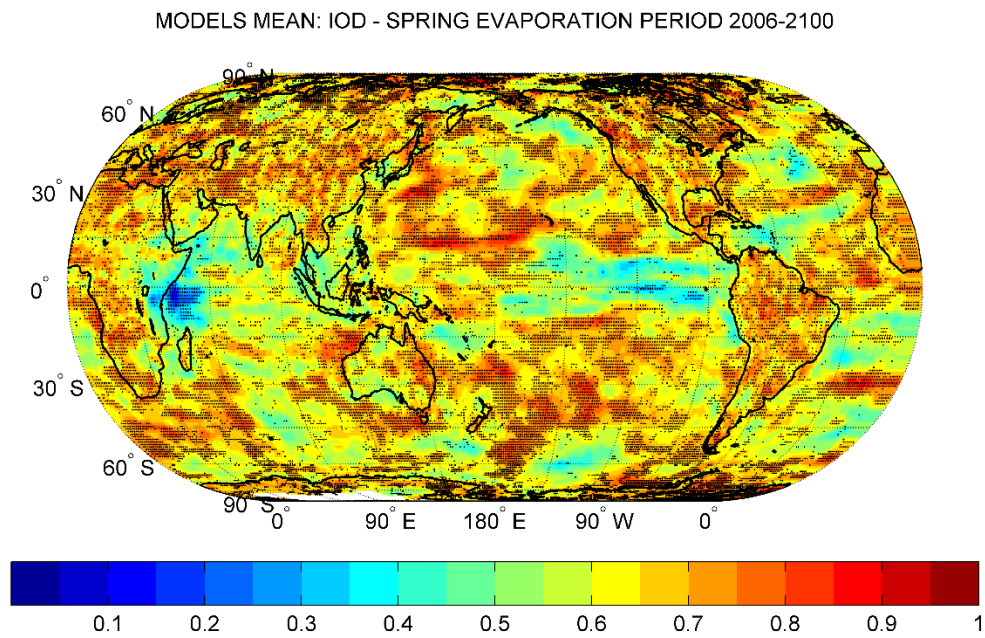



130 c)

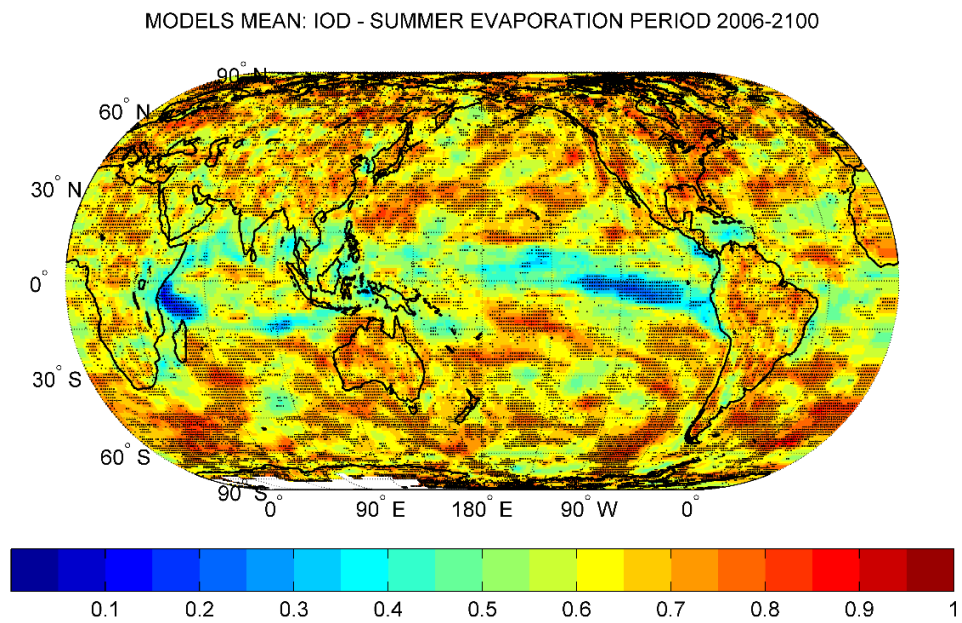

d)

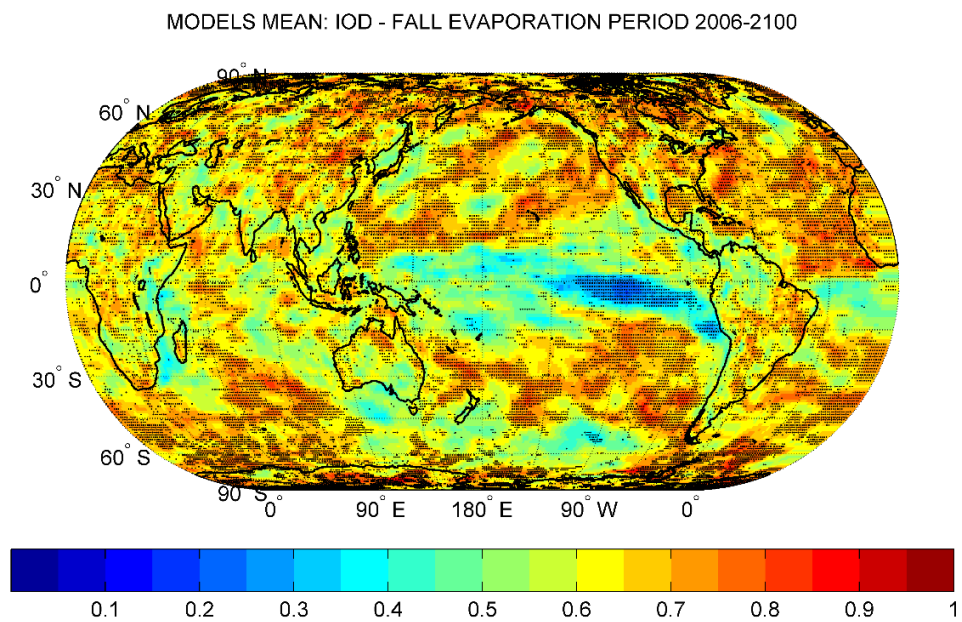

135 **Figure S6.** As in Figure S1 but for Granger causality from IOD to seasonal evaporation for the period 2006-2100.

MODELS MEAN: NAO - EVAPORATION PERIOD 1906-2000

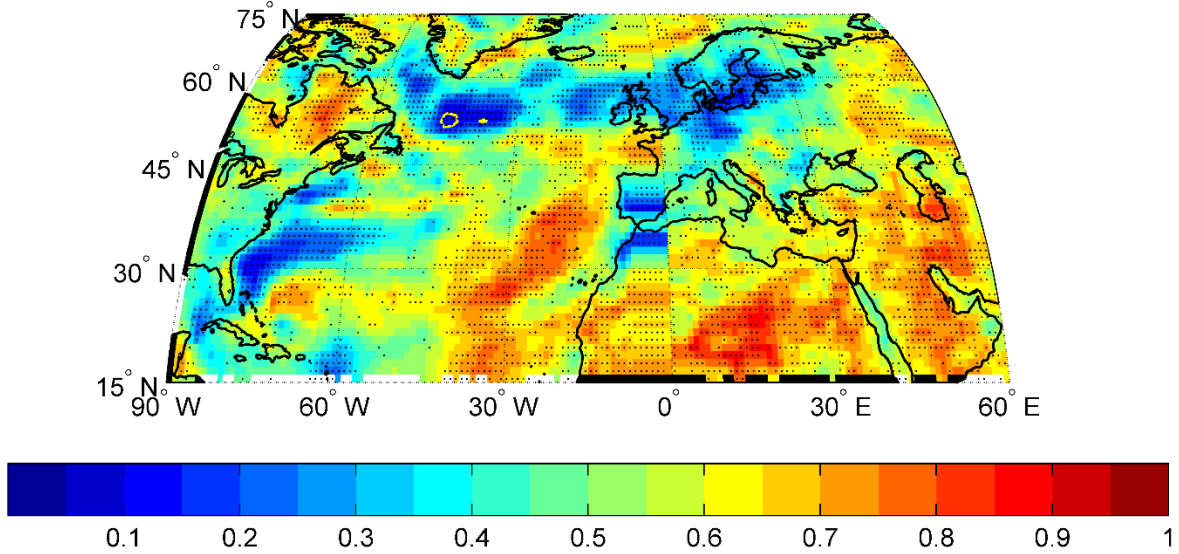

**Figure S7.** Multi-model mean probability map for the absence of Granger causality between NAO and annual mean evaporation for the period 1906-2000 of selected regions. Stippling demonstrates that more than 70% of models show agreement on the multi-model mean probability. The agreement of an individual model is determined when the difference between the multi-model mean probability and the selected model's probability is less than one standard deviation of multi-model mean probability. The red (yellow) contour line designates  $p$  value = 0.05 (0.1). Red shades indicate high probability of no Granger causality.

140

a)

MODELS MEAN: NAO - WINTER EVAPORATION PERIOD 1906-2000

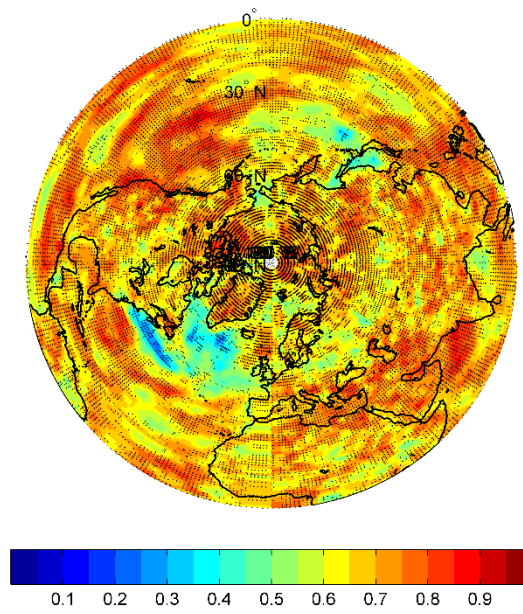

145

b)

MODELS MEAN: NAO - SPRING EVAPORATION PERIOD 1906-2000

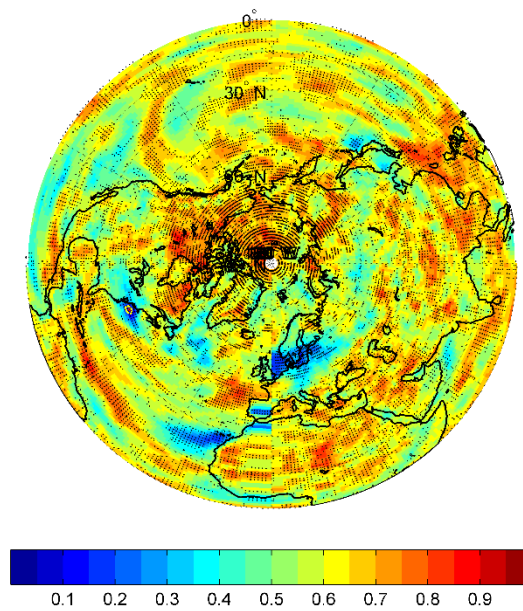

c)

MODELS MEAN: NAO - SUMMER EVAPORATION PERIOD 1906-2000

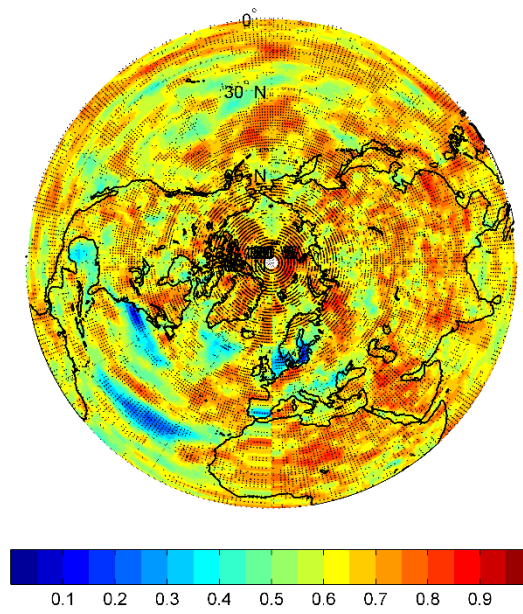

150 d)

MODELS MEAN: NAO - FALL EVAPORATION PERIOD 1906-2000

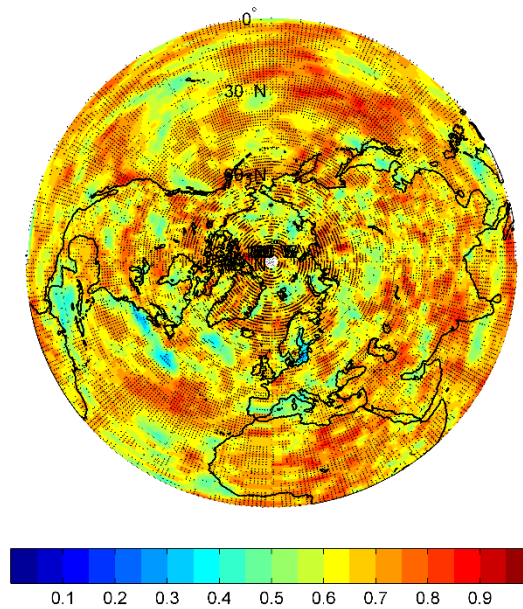

**Figure S8.** As in Figure S1 but for Granger causality from NAO to seasonal evaporation for the period 1850-2005.

a)

MODELS MEAN: NAO - WINTER EVAPORATION PERIOD 2006-2100

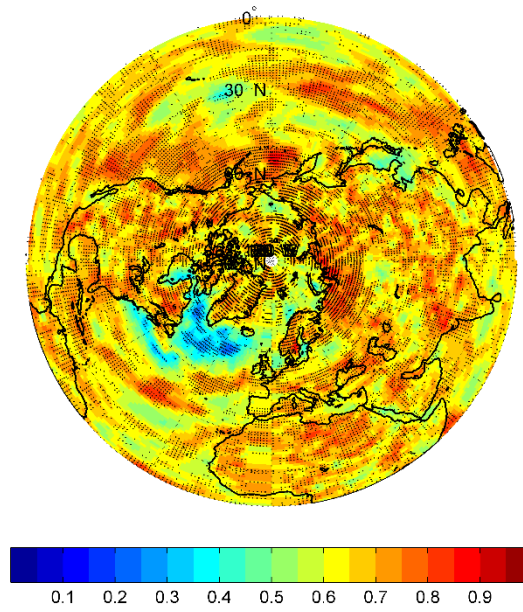

155

b)

MODELS MEAN: NAO - SPRING EVAPORATION PERIOD 2006-2100

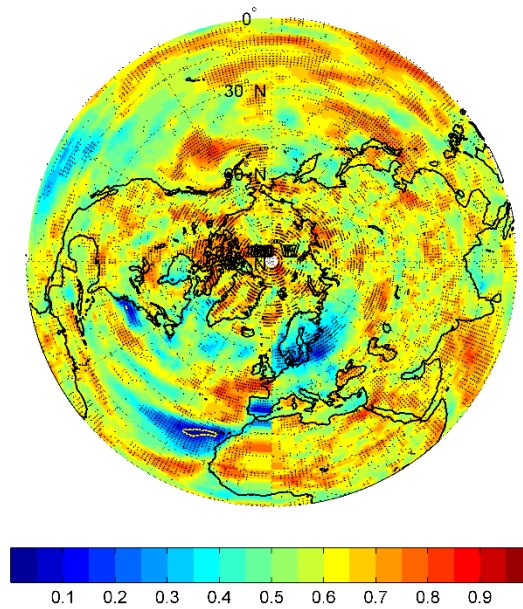



c)

MODELS MEAN: NAO - SUMMER EVAPORATION PERIOD 2006-2100

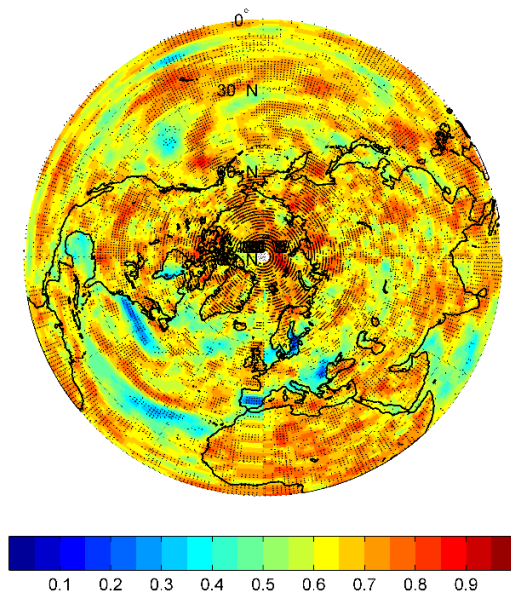

160 d)

MODELS MEAN: NAO - FALL EVAPORATION PERIOD 2006-2100

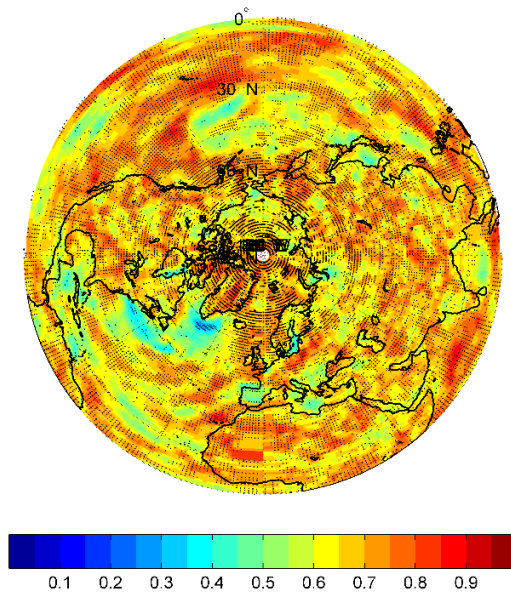

**Figure S9.** As in Figure S1 but for Granger causality from NAO to seasonal evaporation for the period 2006-2100.

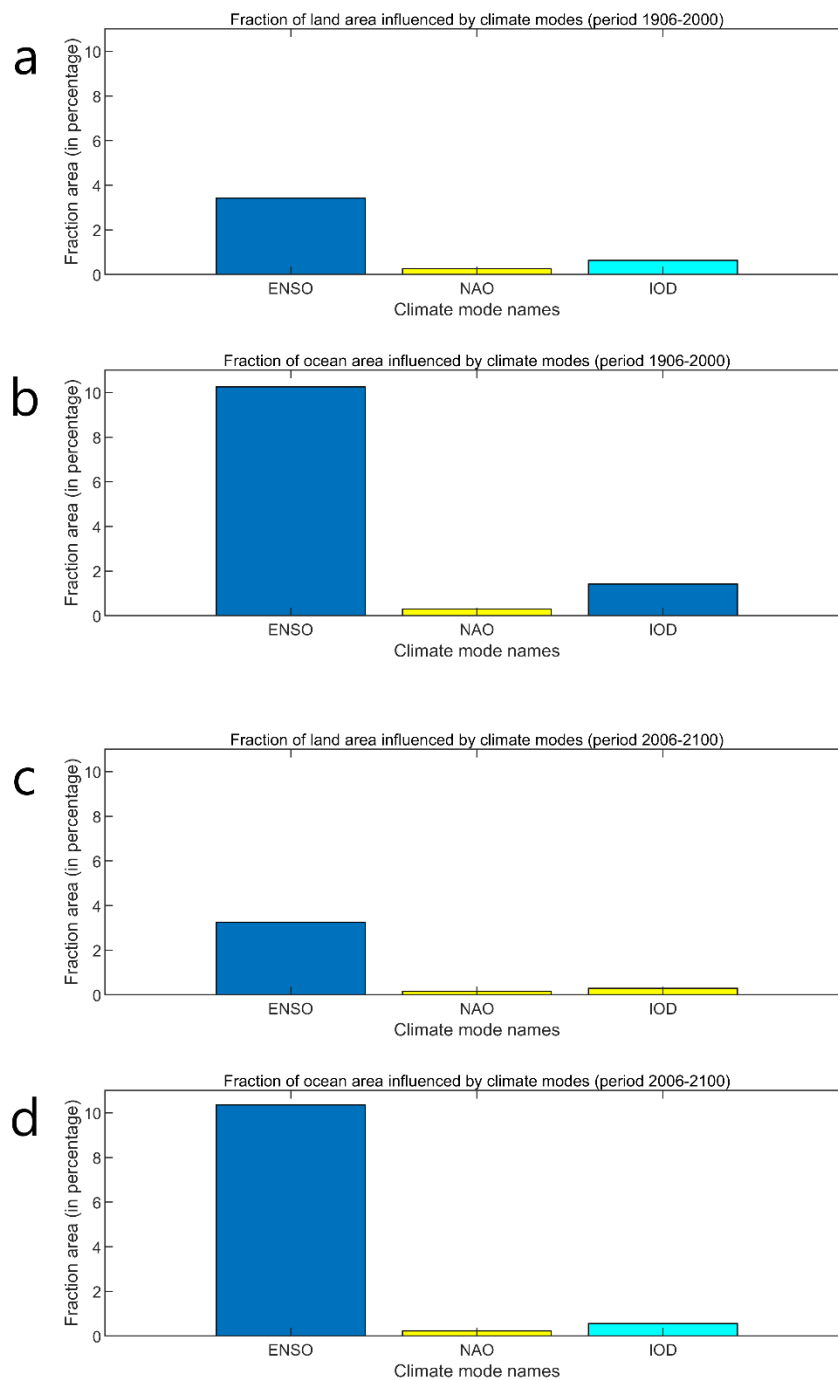

165 **Figure S10.** Fraction of Earth surface for land (a, c) and ocean (b, d) with probability for the absence of  
 170 Granger causality between climate modes and evaporation less than 0.25 (i.e.,  $p$  value  $< 0.25$  and climate  
 modes are unlikely to have no causal effects on evaporation). The results are shown for the influence of  
 individual climate mode on annual mean evaporation for periods 1906-2000 (a, b) and 2006-2100 (c, d).  
 Fraction area lower than 0.5% is plotted in yellow bar. Fraction area higher than 0.5% and lower than 1%  
 is plotted in cyan bar. ENSO = El Niño–Southern Oscillation. NAO = North Atlantic Oscillation. IOD =  
 Indian Ocean Dipole.
